# Supplementary material for: Self-assembly of layered wurtzite ZnS nanorods/nanowires as highly efficient photocatalysts
Source: Royal Society of Chemistry journal article supplement (doi:10.1039/c1jm13259h), 2011-01-01
Supplement: c1jm13259h.pdf [file c1jm13259h.pdf]

Electronic Supplementary Material (ESI) for Journal of Materials Chemistry  
This journal is © The Royal Society of Chemistry 2011

---

## Electronic Supplementary Material

### Self-Assembly of Layered Wurtzite ZnS Nanorods/Nanowires as Highly Efficient Photocatalysts

Yong Liu,<sup>a, b</sup> Juncheng Hu,<sup>\*a</sup> Tengfei Zhou,<sup>a</sup> Renchao Che<sup>b</sup> and Jinlin Li<sup>a</sup>

<sup>a</sup> *Key Laboratory of Catalysis and Materials Science of the State Ethnic Affairs Commission & Ministry of Education, South-Central University for Nationalities, Wuhan, 430074, P.R. China*

<sup>b</sup> *Laboratory of Advanced Materials, Fudan University, Shanghai, 200438, P.R. China.*

Email: [junchenghuhu@hotmail.com](mailto:junchenghuhu@hotmail.com)

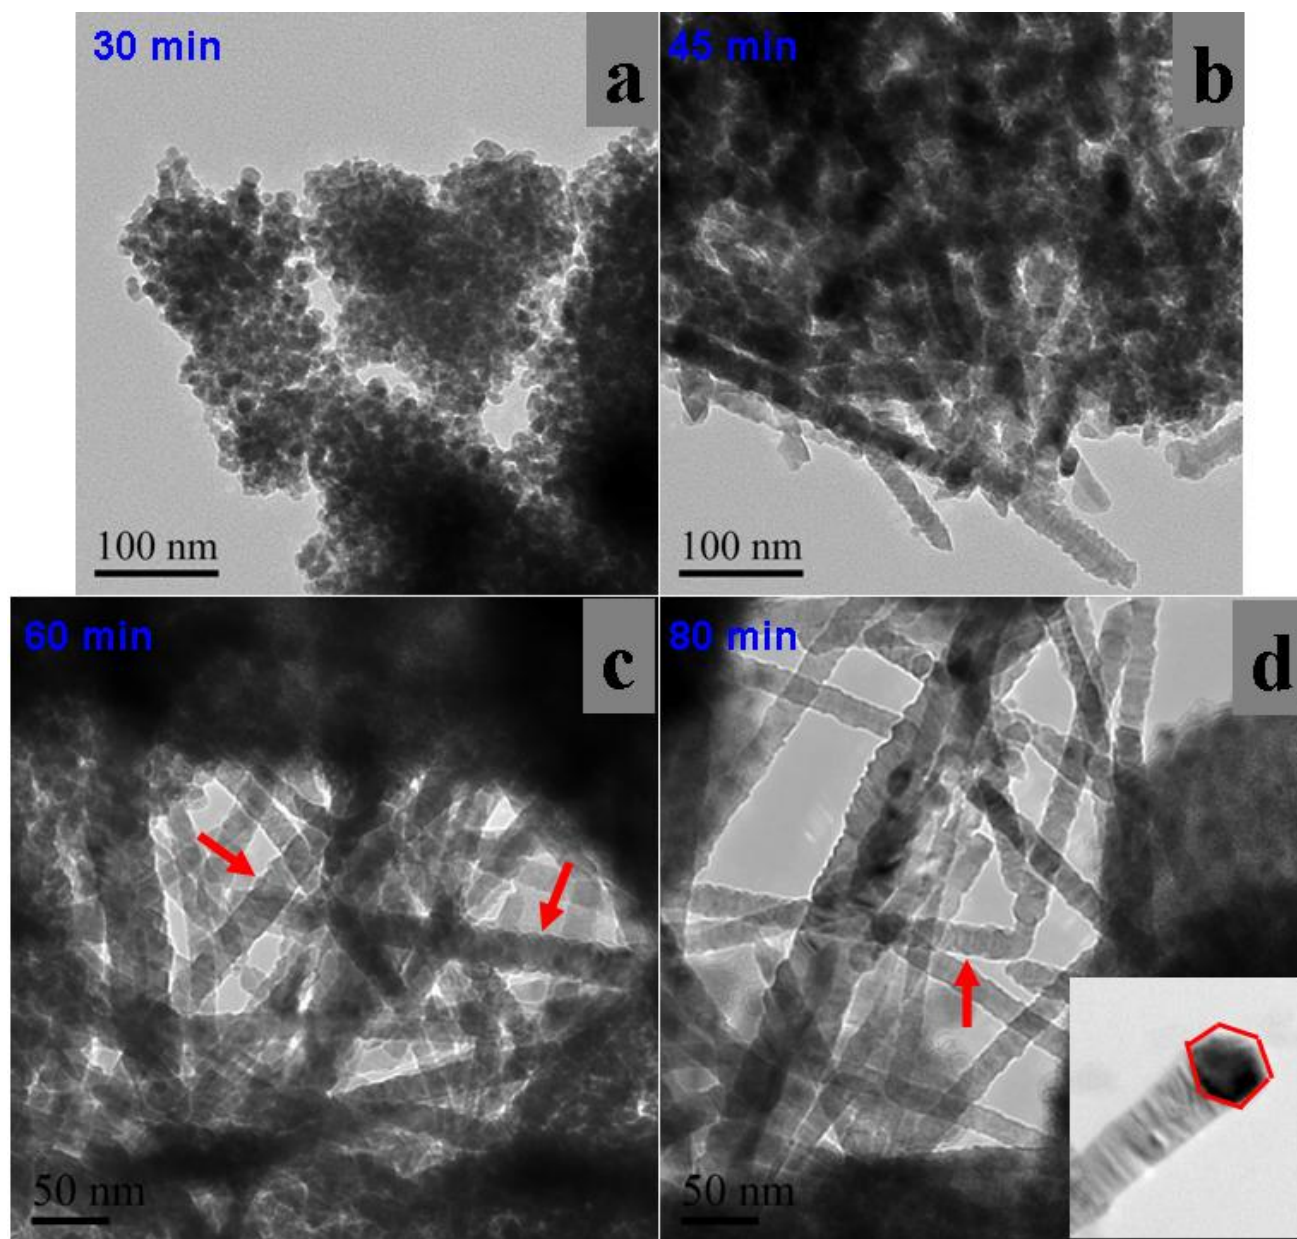

**Figure S1** TEM images of intermediate product obtained at 240°C for (a) 30 min ; (b) 45min; (c) 60 min (d) 80 min (inset, the hexagonal cross-section of a single ZnS NRs obtained at 240°C for 1.5 h).

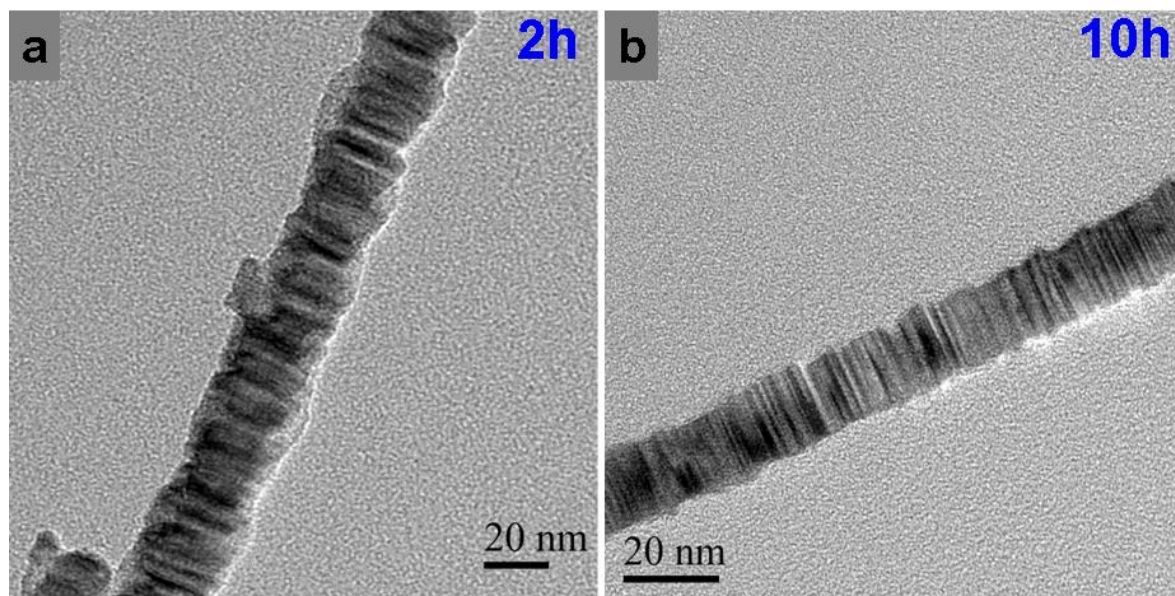

**Figure S2** TEM images ZnS NRs prepared at different reaction time: (a) 2h, (b) 10h.

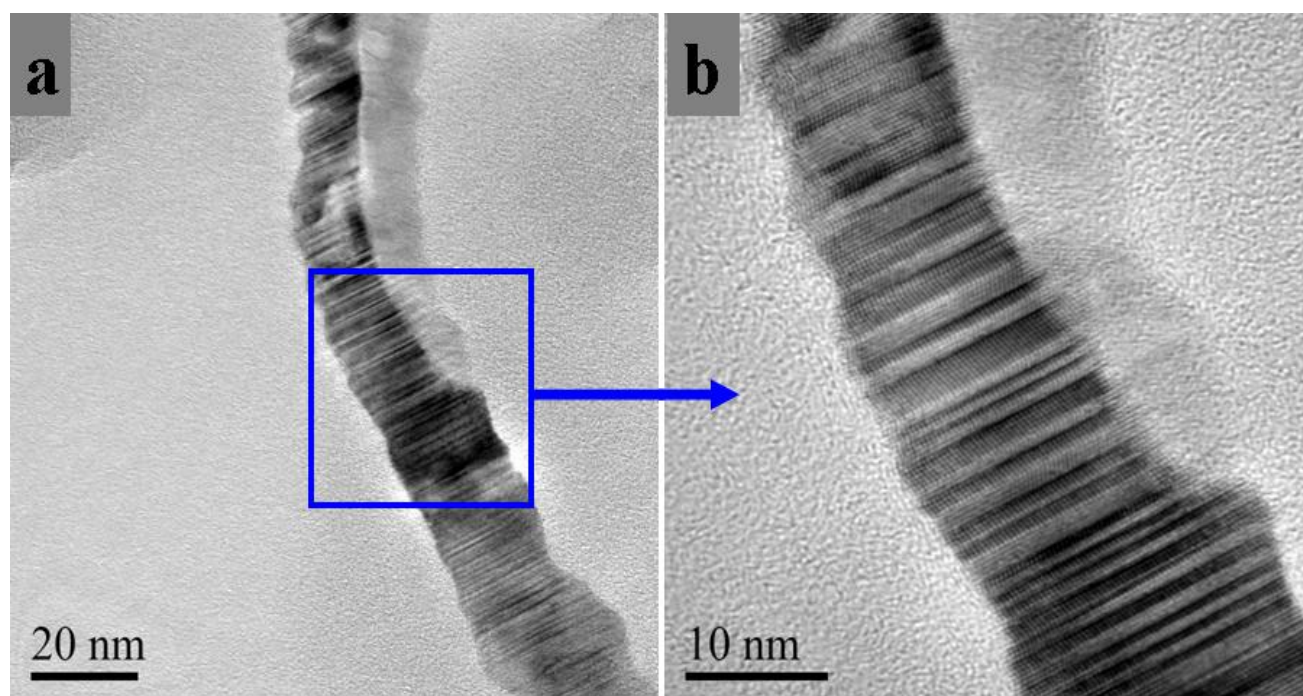

**Figure S3** (a) TEM image of a single tower-like layered ZnS nanorod; (b) HRTEM images of the interlayer part of a single tower-like layered ZnS nanorod (marked by a blue rectangle in a)..

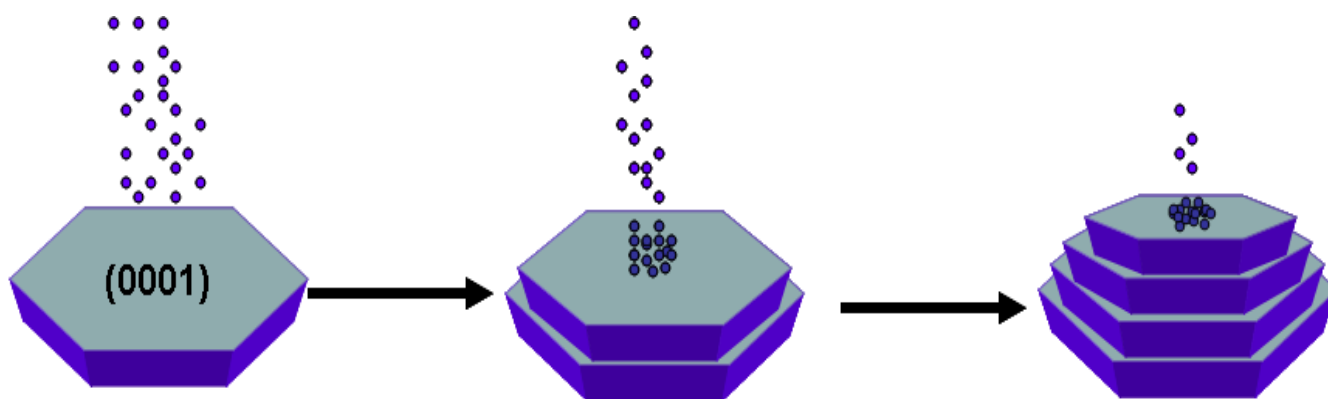

**Figure S4** Schematic illustration for the growth mechanism of the extended tower-like layered ZnS NRs.

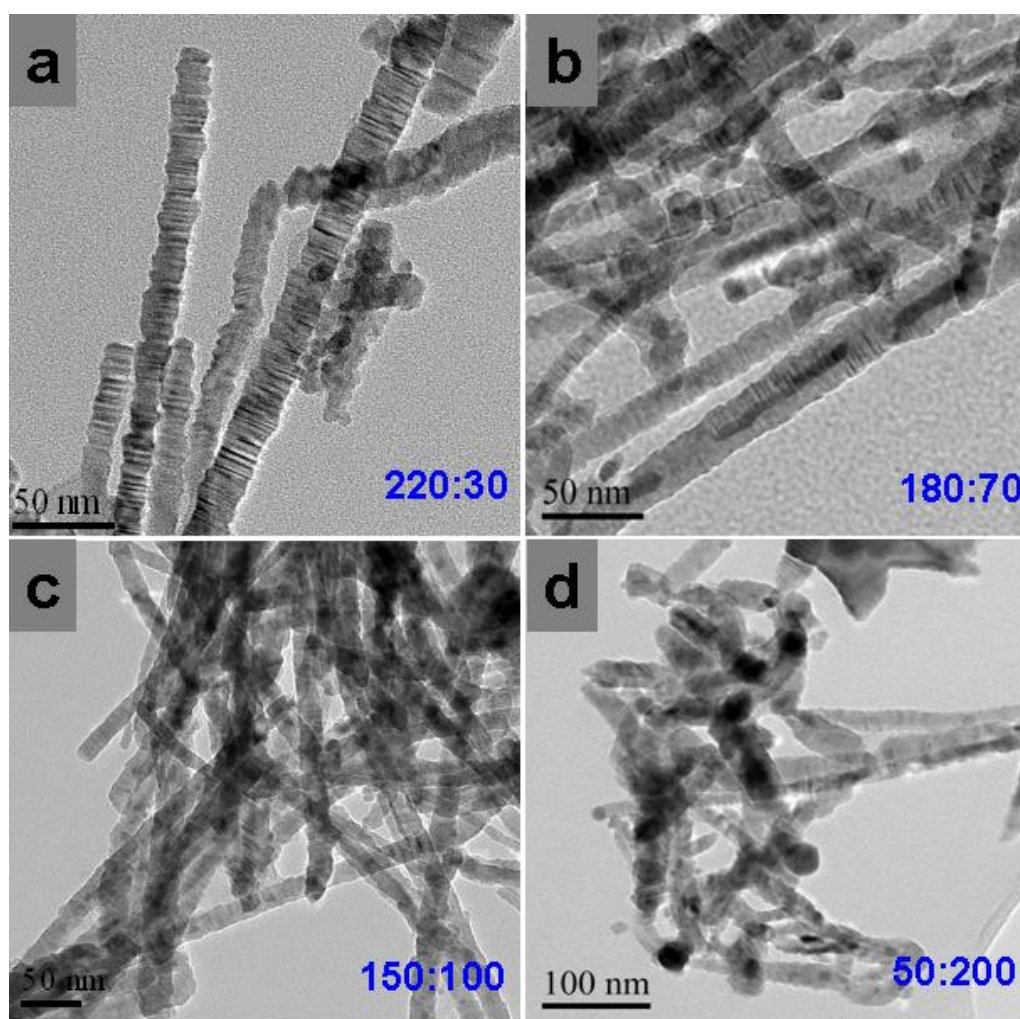

**Figure S5** TEM images of ZnS products prepared in different volume ratio between the methanol and benzyl alcohol ( $V_{\text{methanol}}:V_{\text{benzyl alcohol}}$ )

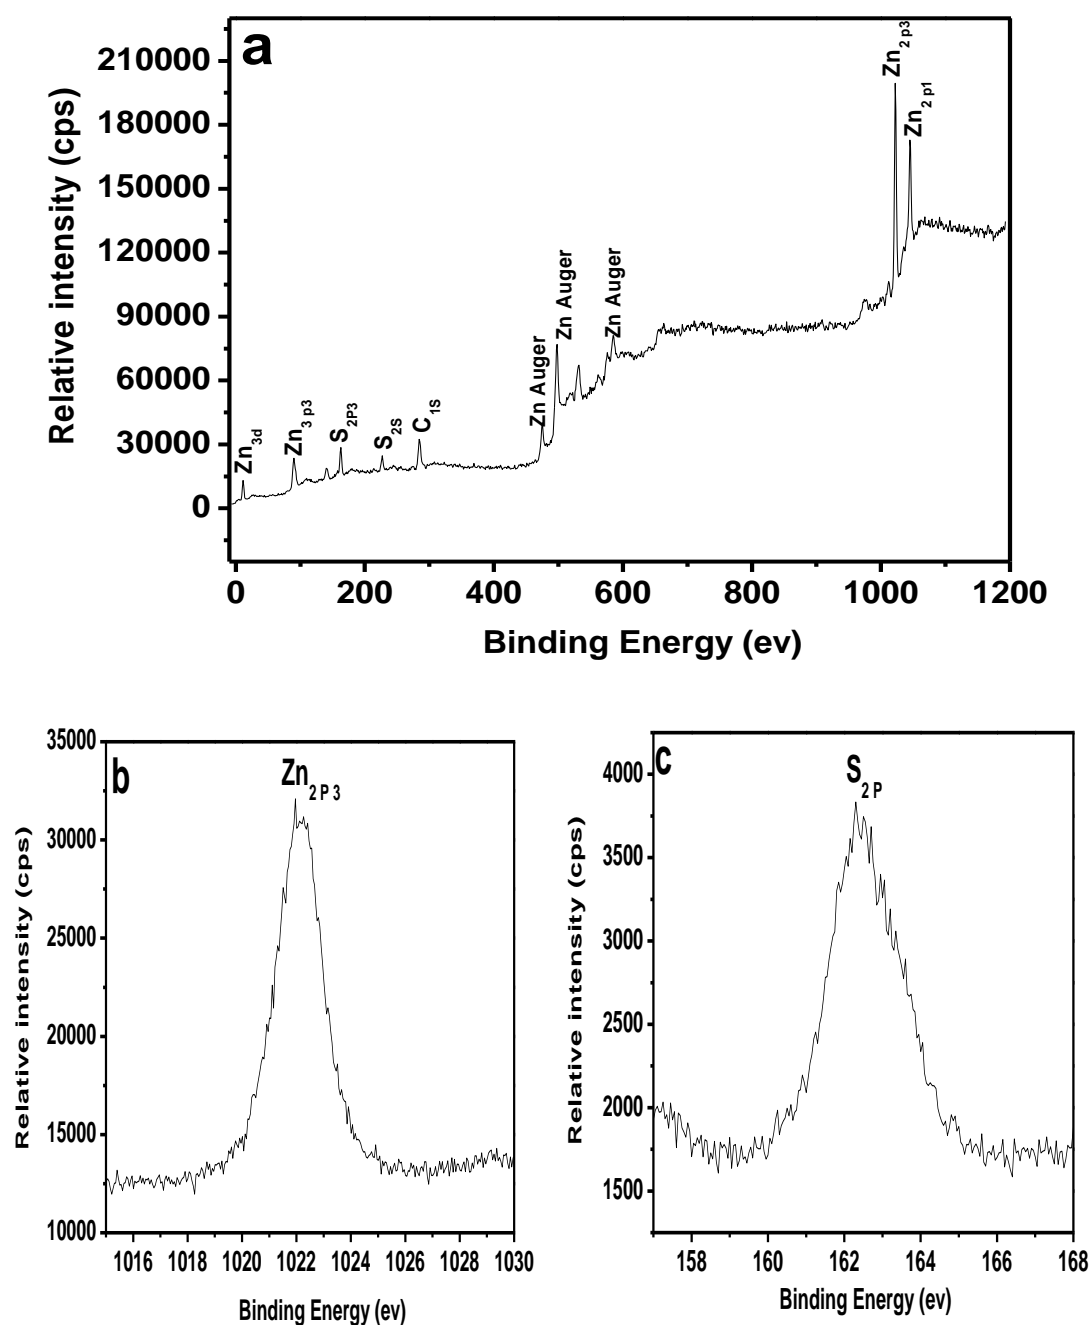

**Figure S6** The typical XPS spectrums of the synthesized layered ZnS nanorod: (a) survey spectrum, (b) Zn  $2p_3$  region spectrum and (c) S  $2p$  region spectrum

The components of the ZnS nanorods are characterized by XPS technique, as indicated in Figure S2. The results show that the products are composed of Zn and S in ratios of 0.89:1, which is inconsistent with the results of EDS.

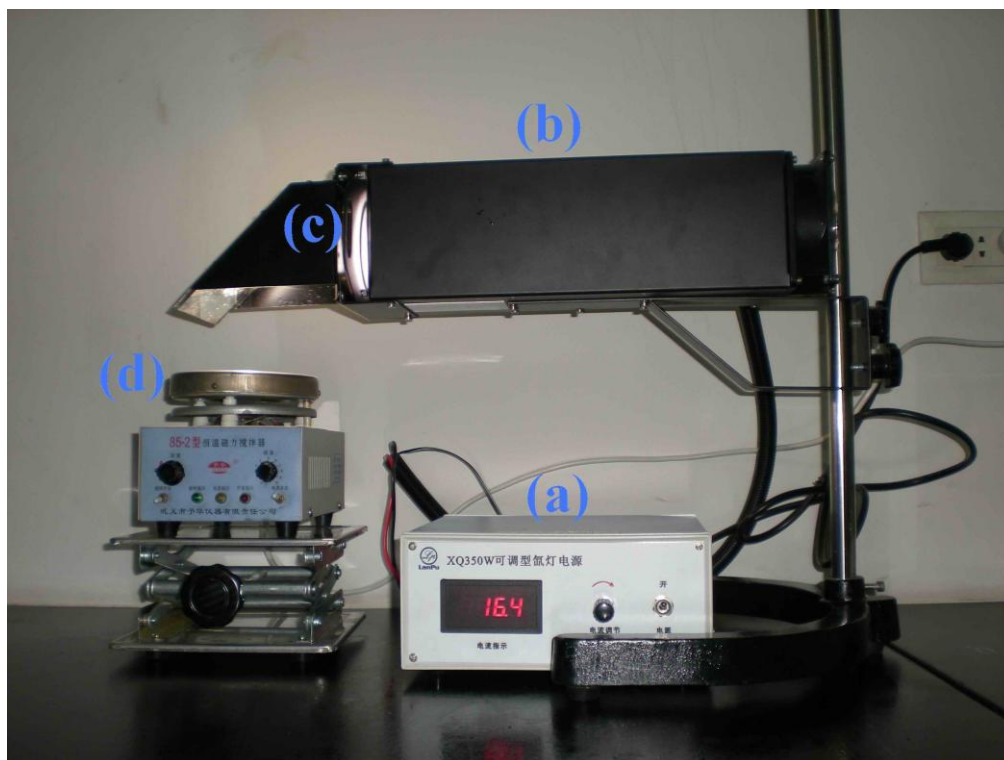

**Figure S7.** The installation of photocatalytic reactor: (a) The controllable electric source. (b) The homothermal reactor equipped with Xenon lamp (XQ 350W). (c) Cut-off filters (d) Magnetic stirring.
